# Supplementary material for: Protein Adsorption in Microengraving Immunoassays
Source: MDPI journal article supplement (doi:10.3390/s151026236), 2015-10-16
Supplement: s1 [file s1]

## Supplementary Information

# Protein Adsorption in Microengraving Immunoassays. *Sensors* 2015, 15, 26236-26250

Qing Song

Chemical and Biomolecular Engineering, New York University Polytechnic School of Engineering, 6 Metro Tech Center, Brooklyn, NY 11201, USA; E-Mail: qs299@nyu.edu; Tel.: +1-718-260-3863

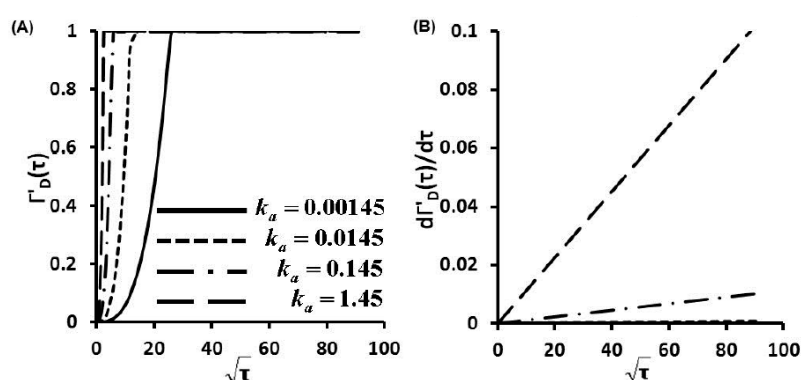

**Figure S1.** Diffusion controlled limits. (A) Concentration of protein captured on glass slide surface as a function of time  $\Gamma_D(\tau)$ ; (B) Protein adsorption rates as a function of time  $d\Gamma_D(\tau)/d\tau$ .

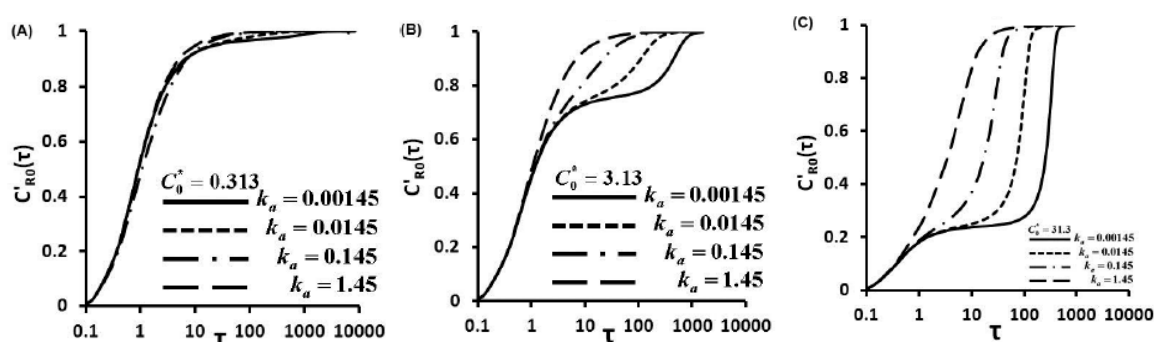

**Figure S2.** Concentration of protein at sublayer of the glass slide surface as a function of time  $C'_{R0}(\tau)$  at different  $C_0^* = 0.313$  (A),  $C_0^* = 3.13$  (B), and  $C_0^* = 31.3$  (C).

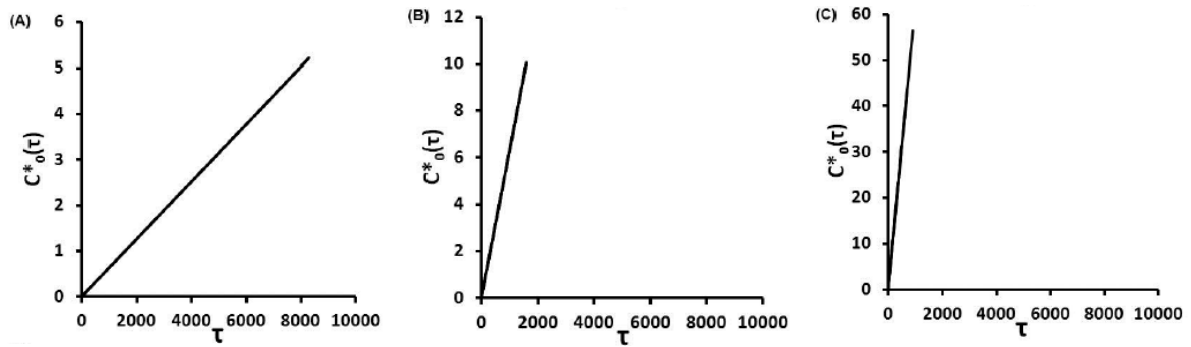

**Figure S3.** Concentration of protein at surface of the single cell as a function of time  $C^*_{R_0}(\tau)$  at different  $C^*_0 = 0.313$  (A),  $C^*_0 = 3.13$  (B), and  $C^*_0 = 31.3$  (C).

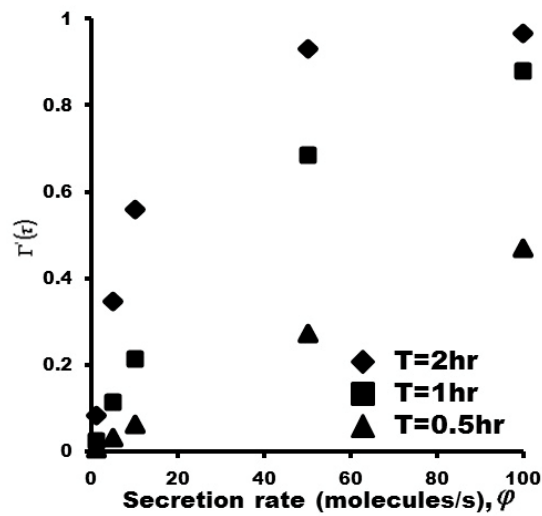

**Figure S4.** Adsorption isotherms ( $K_D = 8.7 \times 10^{-9}$  M) at different incubation time of 2 h, 1 h, and 0.5 h in the range of 1–100 molecules/s.
